# Supplementary material
Source: Research Square preprint supplement (doi:10.21203/rs.3.rs-9044279/v1)
Supplement: Supplementary file 1 [file 364d7acdcaca443e2bc2463f.xlsx]

## Sheet: Sheet1
Elevation (m)	Year glacier edge	Location in transect	Point	Identified species or surface structure
4359	1850	center	1.1	Elaphoglossum sp.
4359	1850	center	1.1	Litter
4359	1850	center	1.2	Lupinus microphyllus
4359	1850	center	1.2	Grass
4359	1850	center	1.3	Cyano biocrust
4359	1850	center	2.1	Gaultheria myrsinoides
4359	1850	center	2.2	Litter
4359	1850	center	2.3	Bryophyte
4359	1850	center	3.1	Elaphoglossum sp.
4359	1850	center	3.1	Bryophyte
4359	1850	center	3.2	Gaultheria myrsinoides
4359	1850	center	3.3	Hieracium sp.
4359	1850	center	3.3	Bryophyte
4359	1850	east	1.1	Gaultheria myrsinoides
4359	1850	east	1.1	Stereocaulon
4359	1850	east	1.1	Festuca sp.
4359	1850	east	1.1	Festuca sp.
4359	1850	east	1.1	Festuca sp.
4359	1850	east	1.1	Festuca sp.
4359	1850	east	1.2	Hieracium sp.
4359	1850	east	1.2	Bryophyte
4359	1850	east	1.3	Gaultheria myrsinoides
4359	1850	east	2.1	Stereocaulon
4359	1850	east	2.2	Stereocaulon
4359	1850	east	2.3	Litter
4359	1850	east	2.3	Bryophyte
4359	1850	east	3.1	Bryophyte
4359	1850	east	3.2	lycopodium_dead
4359	1850	east	3.3	Bryophyte
4359	1850	west	1.1	Luzula racemosa
4359	1850	west	1.1	Lichen foliose
4359	1850	west	1.2	Litter
4359	1850	west	1.3	Lichen foliose
4359	1850	west	2.1	Gaultheria myrsinoides
4359	1850	west	2.1	Stereocaulon
4359	1850	west	2.1	Lichen foliose
4359	1850	west	2.2	Litter
4359	1850	west	2.3	Hypericum laricifolium
4359	1850	west	2.3	Plegmariurus crassus
4359	1850	west	2.3	Plegmariurus crassus
4359	1850	west	2.3	Plegmariurus crassus
4359	1850	west	2.3	Litter
4359	1850	west	3.1	Gaultheria myrsinoides
4359	1850	west	3.1	Litter
4359	1850	west	3.2	Luzula racemosa
4359	1850	west	3.2	Litter
4359	1850	west	3.3	Grass
4359	1850	west	3.3	Elaphoglossum sp.
4359	1850	west	3.3	Gaultheria myrsinoides
4359	1850	west	3.3	Lichen foliose
4648	1960	center	1.1	polytrichum
4648	1960	center	1.2	lichen
4648	1960	center	1.2	Rock
4648	1960	center	1.3	polytrichum
4648	1960	center	2.1	Rock
4648	1960	center	2.2	Rock
4648	1960	center	2.3	Bryophyte biocrust
4648	1960	center	3.1	Lichen biocrust
4648	1960	center	3.2	polytrichum
4648	1960	center	3.3	Bryophyte
4648	1960	east	1.1	Stereocaulon
4648	1960	east	1.2	Lichen crustose
4648	1960	east	1.3	Stereocaulon
4648	1960	east	2.1	Stereocaulon
4648	1960	east	2.2	Bryophyte biocrust
4648	1960	east	2.3	Parmelia
4648	1960	east	3.1	Rock
4648	1960	east	3.2	Dead_Grass
4648	1960	east	3.2	Rock
4648	1960	east	3.3	Cyano biocrust
4648	1960	west	1.1	Rock
4648	1960	west	1.2	Rock
4648	1960	west	1.3	Rock
4648	1960	west	2.1	Rock
4648	1960	west	2.2	Gaultheria myrsinoides
4648	1960	west	2.3	Gaultheria myrsinoides
4648	1960	west	3.1	Gaultheria myrsinoides
4648	1960	west	3.2	Rock
4648	1960	west	3.3	Rock
4660	1990	center	1.1	Bryophyte biocrust
4660	1990	center	1.2	Bryophyte biocrust
4660	1990	center	1.3	Cyano biocrust
4660	1990	center	2.1	Bryophyte biocrust
4660	1990	center	2.2	Cyano biocrust
4660	1990	center	2.3	Cyano biocrust
4660	1990	center	3.1	Lichen biocrust
4660	1990	center	3.2	Gravel
4660	1990	center	3.3	Lichen biocrust
4660	1990	east	1.1	Cyano biocrust
4660	1990	east	1.2	Bryophyte
4660	1990	east	1.3	Cyano biocrust
4660	1990	east	2.1	Bryophyte
4660	1990	east	2.2	Bryophyte biocrust
4660	1990	east	2.3	Bryophyte biocrust
4660	1990	east	3.1	Bryophyte
4660	1990	east	3.2	Rock
4660	1990	east	3.3	Bryophyte
4660	1990	west	1.1	Cyano biocrust
4660	1990	west	1.2	Bryophyte
4660	1990	west	1.3	Bryophyte
4660	1990	west	2.1	Bryophyte
4660	1990	west	2.2	Bryophyte biocrust
4660	1990	west	2.3	Bryophyte
4660	1990	west	3.1	Bryophyte
4660	1990	west	3.2	Bryophyte
4660	1990	west	3.3	Bryophyte
4690	2010	center	1.1	Grass
4690	2010	center	1.1	Cyano biocrust
4690	2010	center	1.2	Cyano biocrust
4690	2010	center	1.3	Cyano biocrust
4690	2010	center	2.1	Bare ground
4690	2010	center	2.2	Grass
4690	2010	center	2.2	Bare ground
4690	2010	center	2.3	Cyano biocrust
4690	2010	center	2.3	Stereocaulon
4690	2010	center	3.1	Grass
4690	2010	center	3.1	Cyano biocrust
4690	2010	center	3.2	Bare ground
4690	2010	center	3.3	Rock
4690	2010	east	1.1	Rock
4690	2010	east	1.2	Bare ground
4690	2010	east	1.3	Lichen biocrust
4690	2010	east	2.1	Bare ground
4690	2010	east	2.2	Bare ground
4690	2010	east	2.3	Bare ground
4690	2010	east	3.1	Rock
4690	2010	east	3.2	Bare ground
4690	2010	east	3.3	Bare ground
4690	2010	west	1.1	Rock
4690	2010	west	1.2	Bryophyte
4690	2010	west	1.3	Bryophyte
4690	2010	west	1.3	Lichen crustose
4690	2010	west	2.1	Bryophyte
4690	2010	west	2.2	Rock
4690	2010	west	2.3	Rock
4690	2010	west	3.1	Rock
4690	2010	west	3.2	Rock
4690	2010	west	3.3	Bryophyte
4698	2020	center	1.1	Bare ground
4698	2020	center	1.2	Rock
4698	2020	center	1.3	Bare ground
4698	2020	center	2.1	Rock
4698	2020	center	2.2	Bare ground
4698	2020	center	2.3	Rock
4698	2020	center	3.1	Rock
4698	2020	center	3.2	Rock
4698	2020	center	3.3	Rock
4698	2020	east	1.1	Bare ground
4698	2020	east	1.2	Bare ground
4698	2020	east	1.3	Bare ground
4698	2020	east	2.1	Bare ground
4698	2020	east	2.2	Bare ground
4698	2020	east	2.3	Bare ground
4698	2020	east	3.1	Bare ground
4698	2020	east	3.2	Bare ground
4698	2020	east	3.3	Bare ground
4698	2020	west	1.1	Bare ground
4698	2020	west	1.2	Bare ground
4698	2020	west	1.3	Bare ground
4698	2020	west	2.1	Bare ground
4698	2020	west	2.2	Bare ground
4698	2020	west	2.3	Bare ground
4698	2020	west	3.1	Bare ground
4698	2020	west	3.2	Bare ground
4698	2020	west	3.3	Bare ground
